# Supplementary material for: Describing the hidden species diversity of Chaetozone (Annelida, Cirratulidae) in the Norwegian Sea using morphological and molecular diagnostics
Source: Zookeys. 2021 May 21;1039:139–76. doi: 10.3897/zookeys.1039.61098 (PMC8163715; doi:10.3897/zookeys.1039.61098)
Supplement: Supplementary material 1 — Specimens data [file zookeys-1039-139-s001.xlsx]

## Sheet: Sheet2
MT065910				POLNB2503-18
MT065911				POLNB2504-18
MT065912				POLNB2506-18
MT065913				POLNB2510-18
MT065914				POLNB2518-18
MT065915				POLNB2519-18
MT065916				POLNB2521-18
MT065917				POLNB2522-18
MT065918				POLNB2523-18
MT065919				POLNB2524-18
MT065920				POLNB2528-18
MT065921				POLNB2529-18
MT065922				POLNB2530-18
MT065923				POLNB2531-18
MT065924				POLNB2533-18
MT065925				POLNB2534-18
MT065926				POLNB2535-18
MT065927				POLNB2537-18
MT065928				POLNB2541-18
MT065929				POLNB2543-18
MT065930				POLNB2544-18
MT065931				POLNB2549-18
MT065932				POLNB2550-18
MT065933				POLNB2551-18
MT065934				POLNB2552-18
MT065935				POLNB2554-18
MT065936				POLNB2556-18
MT065937				POLNB2557-18
MT065938				POLNB2559-18
MT065939				POLNB2562-18
MT065940				POLNB2565-18
MT065941				POLNB2566-18
MT065942				POLNB2567-18
MT065943				POLNB2569-18
MT065944				POLNB2570-18
MT065945				POLNB2571-18
MT065946				POLNB2572-18
MT065947				POLNB2573-18
MT065948				POLNB2574-18
MT065949				POLNB2577-18
MT065950				POLNB2578-18
MT065951				POLNB2584-18
MT065952				POLNB2586-18
MT065953				POLNB2587-18
MT065954				POLNB2588-18
MT065955				POLNB2594-18
MT065956				POLNB2595-18
MT065957
MT065958
MT065959
MT065960
MT065961
MT065962
MT065963
MT065964
MT065965
MT065966
MT065967
MT065968
MT065969
MT065970
MT065971
MT065972
MT065973
MT065974
MT065975
MT065976
MT065977
MT065978
MT065979
MT065980
MT065981
MT065982
MT065983
MT065984
MT065985
MT065986
MT065987
MT065988
MT065989
MT065990
MT065991
MT065992
MT065993
MT065994
MT065995
MT065996
MT065997
MT065998
MT065999
MT066000
MT066001
MT066002
MT066003
MT066004
MT066005
MT066006
MT066007
MT066008
MT066009
MT066010
MT066011
MT066012
MT066013
MT066014
MT066015
MT066016
MT066017
MT066018
MT066019
MT066020
MT066021
MT066022
MT066023
MT066024
MT066025
MT066026
MT066027
MT066028
MT066029
MT066030
MT066031
MT361869
MT361870
MT361871

## Sheet: Sheet1
Supplementary Material 1: List of Sequences
ID/Voucher/Terminal	BOLD ID COI	GenBank ID COI	GenBank ID 28S	Genus	Species	Collection Date	Collection method	Country	Locality	Decimal latitude	Decimal longitude	Depth
09PROBE-01111	CCANN550-09	GU672355		Chaetozone	16	2009-07-24		Canada	Churchill, 14 km E Churchill, Golf Balls Intertidal, off shore, Subtidal, mud	58.798	-94.15	23
NUNAV-0075	CCPOL075-07	HQ024281		Chaetozone	15	2000-08-07		Canada	Resolute, Resolute Bay	74.684	-94.857
NUNAV-0193	CCPOL193-07	HQ024275		Chaetozone	15	2001-07-27		Canada	Igloolik	69.372	-81.791
NUNAV-0194	CCPOL194-07	HQ024276		Chaetozone	15	2001-07-27		Canada	Igloolik	69.372	-81.791
NUNAV-0236	CCPOL236-07	HQ024277		Chaetozone	15	2001-08-02		Canada	Igloolik, Igloolik Bay, Benthos	69.372	-81.791
NUNAV-0238	CCPOL238-07	HQ024278		Chaetozone	15	2001-08-02		Canada	Igloolik, Igloolik Bay, Benthos	69.372	-81.791
NUNAV-0241	CCPOL241-07	HQ024279		Chaetozone	15	2001-08-02		Canada	Igloolik, Igloolik Bay, Benthos	69.372	-81.791
NUNAV-0242	CCPOL242-07	HQ024280		Chaetozone	15	2001-08-02		Canada	Igloolik, Igloolik Bay, Benthos	69.372	-81.791
NUNAV-0271	CCPOL271-08	HQ024284		Chaetozone	16	2001-08-02		Canada	Igloolik, Igloolik Bay	69.372	-81.791
HLC-30456	CCPOL281-08	HQ024282		Chaetozone	15	2000-08-21		Canada	Resolute	74.684	-94.857
HLC-30462	CCPOL282-08	HQ024285		Chaetozone	16	2000-08-18		Canada	Resolute	74.684	-94.857
CCPOL311	CCPOL313-08	HQ024283		Chaetozone	15	2001-08-02		Canada	Cornwallis Island, Resolute, Resolute Bay	74.684	-94.857
MBI-SCCWRP-00160	CMBIA160-11			Chaetozone	23	2010-07-09		United States	Los Angeles County, Palos Verdes Peninsula, Station 10C	33.668	-118.297	61
MBI-SCCWRP-00161	CMBIA161-11			Chaetozone	23	2008-09-11		United States	North Channel Islands, Santa Rosa Island, B`08-7438	33.913	-119.948	68
MBI-SCCWRP-00507	CMBIA374-11			Chaetozone	23	2008-09-11		United States	N. Channel Islands, Santa Rosa Island, B`08-7438	33.913	-119.948	68
MBI-SCCWRP-00508	CMBIA375-11			Chaetozone	23	2008-09-11		United States	N. Channel Islands, Santa Rosa Island, B`08-7438	33.913	-119.948	68
WS0086	WSPO086-09	GU672600		Chaetozone	8	2009-09-09		Russia	Kandalaksha Bay, Velikaya Salma Strait, 35 m van veen muddy sand	66.528	33.238	35
WS0095	WSPO095-09	GU672595		Chaetozone	8	2009-09-09		Russia	Kandalaksha Bay, Velikaya Salma Strait, 35 m van veen muddy sand	66.528	33.238	35
WS0096	WSPO096-09	GU672592		Chaetozone	8	2009-09-09		Russia	Kandalaksha Bay, Velikaya Salma Strait, 35 m van veen muddy sand	66.528	33.238	35
WS0103	WSPO103-09	GU672584		Chaetozone	8	2009-09-09		Russia	Kandalaksha Bay, Velikaya Salma Strait, 35 m van veen muddy sand	66.528	33.238	35
WS0105	WSPO105-09	GU672583		Chaetozone	8	2009-09-09		Russia	Kandalaksha Bay, Velikaya Salma Strait, 35 m van veen muddy sand	66.528	33.238	35
WS0108	WSPO108-09	GU672581		Chaetozone	8	2009-09-09		Russia	Kandalaksha Bay, Velikaya Salma Strait, 105 m van veen coarse mud	66.533	33.285	105
WS0109	WSPO109-09	GU672582		Chaetozone	8	2009-09-09		Russia	Kandalaksha Bay, Velikaya Salma Strait, 105 m van veen coarse mud	66.533	33.285	105
WS0111	WSPO111-09	GU672580		Chaetozone	8	2009-09-09		Russia	Kandalaksha Bay, Velikaya Salma Strait, 105 m van veen coarse mud	66.533	33.285	105
WS0112	WSPO112-09	GU672577		Chaetozone	8	2009-09-09		Russia	Kandalaksha Bay, Velikaya Salma Strait, 105 m van veen coarse mud	66.533	33.285	105
WS0276	WSPO276-09	GU672431		Chaetozone	8	2009-09-15		Russia	Kandalaksha Bay, Velikaya Salma Strait, Dive 10m	66.918	33.103	10
NTNUVM68231	PONOR066-13			Chaetozone	8	09-Oct-2011		Norway	Porsangerfjorden	70.12	25.186
ZMBN94537	POLNB585-14			Chaetozone	2	03-Oct-2012		Norway		62.482	4.466	213
ZMBN94483	POLNB646-14			Chaetozone	4	08-Oct-2013		Norway		64.804	10.111	378
ZMBN94633	POLNB736-14			Chaetozone	8	03-Aug-2013		Norway		72.58	32.384	270
ZMBN95386	POLNB1149-14			Chaetozone	10	23-Apr-2014		Norway		60.173	5.003	6
ZMBN95707	POLNB1317-14			Chaetozone	3	22-Apr-2011		Norway		71.338	25.22	297
	NBAAV025-14			Chaetozone	13	26-Jul-2012		Norway	Spitsbergen	79.082	4.098	2458.3
	NBAAV026-14			Chaetozone	13	18-Jul-2012		Norway	Spitsbergen	78.934	4.993	2609.2
	NBAAV027-14			Chaetozone	13	26-Jul-2012		Norway	Spitsbergen	79.082	4.098	2458.3
	NBAAV029-14			Chaetozone	13	25-Jul-2012		Norway	Spitsbergen	79.284	4.326	2363.5
ZMBN98242	POLNB1548-15			Chaetozone	11			Norway		67.323	14.473
ZMBN98250	POLNB1556-15			Chaetozone	1			Norway		61.377	2.11215	280
ZMBN116562	POLNB2219-17			Chaetozone	1	13-Jun-2017		Norway		60.2593	5.13703	248
ZMBN117820	POLNB2240-17			Chaetozone	2	03-May-2017		Norway		61.0501	5.40055	1236
ZMBN117860	POLNB2280-17			Chaetozone	10	08-Jun-2017		Norway		60.1688	5.00267	13
ZMBN120505	POLNB2475-18			Chaetozone	14	02-Sep-2015		Norway		66.8433	7.8945	735
08PROBE-272	CCANN361-08	HQ023815		Chaetozone	17	2008-07-15		Canada	Churchill, 14 km SW Churchill, Button Bay, Dredge with Len 3	58.752	-94.315	6
08PROBE-0274	CCANN363-08	HQ023816		Chaetozone	17	2008-07-15		Canada	Churchill, 14 km SW Churchill, Button Bay, Dredge with Len 3	58.752	-94.315	6
08PROBE-0275	CCANN364-08	HQ023817		Chaetozone	17	2008-07-15		Canada	Churchill, 14 km SW Churchill, Button Bay, Dredge with Len 3	58.752	-94.315	6
08PROBE-0280	CCANN369-08	HQ023818		Chaetozone	17	2008-07-15		Canada	Churchill, 14 km SW Churchill, Button Bay, Dredge with Len 3	58.752	-94.315	6
08PROBE-0283	CCANN372-08	HQ023795		Chaetozone	17	2008-07-15		Canada	Churchill, 14 km SW Churchill, Button Bay, Dredge with Len 2	58.748	-94.343	7
08PROBE-0285	CCANN374-08	HQ023796		Chaetozone	17	2008-07-15		Canada	Churchill, 14 km SW Churchill, Button Bay, Dredge with Len 2	58.748	-94.343	7
08PROBE-0287	CCANN376-08	HQ023797		Chaetozone	17	2008-07-15		Canada	Churchill, 14 km SW Churchill, Button Bay, Dredge with Len 2	58.748	-94.343	7
08PROBE-0292	CCANN381-08	HQ023798		Chaetozone	17	2008-07-15		Canada	Churchill, 14 km SW Churchill, Button Bay, Dredge with Len 2	58.748	-94.343	7
08PROBE-0295	CCANN384-08	HQ023799		Chaetozone	17	2008-07-15		Canada	Churchill, 14 km SW Churchill, Button Bay, Dredge with Len 2	58.748	-94.343	7
08PROBE-0296	CCANN385-08	HQ023800		Chaetozone	17	2008-07-15		Canada	Churchill, 14 km SW Churchill, Button Bay, Dredge with Len 2	58.748	-94.343	7
08PROBE-0298	CCANN387-08	HQ032802		Chaetozone	17	2008-07-15		Canada	Churchill, 14 km SW Churchill, Button Bay, Dredge with Len 2	58.748	-94.343	7
08PROBE-0300	CCANN389-08	HQ023803		Chaetozone	17	2008-07-15		Canada	Churchill, 14 km SW Churchill, Button Bay, Dredge with Len 2	58.748	-94.343	7
08PROBE-0306	CCANN395-08	HQ023804		Chaetozone	17	2008-07-15		Canada	Churchill, 14 km SW Churchill, Button Bay, Dredge with Len 2	58.748	-94.343	7
08PROBE-0310	CCANN399-08	HQ023805		Chaetozone	17	2008-07-15		Canada	Churchill, 14 km SW Churchill, Button Bay, Dredge with Len 2	58.748	-94.343	7
08PROBE-0311	CCANN400-08	HQ023806		Chaetozone	17	2008-07-15		Canada	Churchill, 14 km SW Churchill, Button Bay, Dredge with Len 2	58.748	-94.343	7
08PROBE-0312	CCANN401-08	HQ023807		Chaetozone	17	2008-07-15		Canada	Churchill, 14 km SW Churchill, Button Bay, Dredge with Len 2	58.748	-94.343	7
08PROBE-0314	CCANN403-08	HQ023808		Chaetozone	17	2008-07-15		Canada	Churchill, 14 km SW Churchill, Button Bay, Dredge with Len 2	58.748	-94.343	7
08PROBE-0515	CCANN410-08	HQ023809		Chaetozone	17	2008-07-16		Canada	Churchill, 14 km SW Churchill, Button Bay, Dredge with Mike 1	58.767	-94.289	5
08PROBE-0517	CCANN412-08	HQ023810		Chaetozone	17	2008-07-16		Canada	Churchill, 14 km SW Churchill, Button Bay, Dredge with Mike 1	58.767	-94.289	5
08PROBE-0518	CCANN413-08	HQ023811		Chaetozone	17	2008-07-16		Canada	Churchill, 14 km SW Churchill, Button Bay, Dredge with Mike 1	58.767	-94.289	5
08PROBE-0519	CCANN414-08	HQ023812		Chaetozone	17	2008-07-16		Canada	Churchill, 14 km SW Churchill, Button Bay, Dredge with Mike 1	58.767	-94.289	5
08PROBE-0550	CCANN445-08	HQ023813		Chaetozone	17	2008-07-16		Canada	Churchill, 14 km SW Churchill, Button Bay, Dredge with Mike 1	58.767	-94.289	5
08PROBE-0567	CCANN462-08	HQ023814		Chaetozone	17	2008-07-15		Canada	Churchill, 14 km SW Churchill, Button Bay, Dredge with Len 3	58.752	-94.315	5
09PROBE-08207	CCANN643-09	GU672122		Chaetozone	17	2009-07-24		Canada	Churchill, 24 km E Churchill, Gordon Point, off shore, Subtidal, sand	58.83	-93.82	9
09PROBE-08236	CCANN672-09	GU672146		Chaetozone	17	2009-07-24		Canada	Churchill, 24 km E Churchill, Gordon Point, off shore, Subtidal, sand	58.83	-93.82	9
09PROBE-08241	CCANN677-09	GU672152		Chaetozone	17	2009-07-24		Canada	Churchill, 24 km E Churchill, Gordon Point, off shore, Subtidal, sand	58.83	-93.82	9
09PROBE-08252	CCANN688-09	GU672161		Chaetozone	17	2009-07-25		Canada	Churchill, 24 km E Churchill, Gordon Point, Intertidal, rock, sand, kelp	58.792	-93.751
09PROBE-08386	CCANN822-09	GU672260		Chaetozone	17	2009-07-27		Canada	Churchill, 4 km NW Churchill, Prince of Wales Fort NHS, off shore, Subtidal, mud	58.856	-94.23	26
09PROBE-08387	CCANN823-09	GU672259		Chaetozone	17	2009-07-27		Canada	Churchill, 4 km NW Churchill, Prince of Wales Fort NHS, off shore, Subtidal, mud	58.856	-94.23	26
09PROBE-08443	CCANN879-09	GU672304		Chaetozone	17	2009-07-27		Canada	Churchill, 4 km NW Churchill, Prince of Wales Fort NHS, off shore, Subtidal, mud	58.856	-94.23	26
ZMBN 125756	POLNB2510-18		MT365584	Chaetozone	7	2014-10-20	Triangular dredge	Norway	Drøbak, Sør for Storskjær	59.6562	10.6081	31
ZMBN 125764	POLNB2518-18			Chaetozone	8	2013-08-09	RP-sledge	Barents Sea		71.61528	32.99719	305
ZMBN 125766	POLNB2519-18		MT365585	Chaetozone	8	2015-05-13	rp slede	Svalbard	Isfjorden	78.14872	13.12559	243
ZMBN 125767	POLNB2521-18			Chaetozone	8	2015-05-13	rp slede	Svalbard	Isfjorden	78.14872	13.12559	243
ZMBN 125768	POLNB2522-18		MT365586	Chaetozone	8	2015-05-13	rp slede	Svalbard	Isfjorden	78.14872	13.12559	243
ZMBN 125769	POLNB2523-18			Chaetozone	8	2015-05-13	rp slede	Svalbard	Isfjorden	78.14872	13.12559	243
ZMBN 125770	POLNB2524-18			Chaetozone	8	2015-05-09	rp slede	Svalbard		79.68089	11.13989	180
ZMBN 125774	POLNB2528-18		MT365587	Chaetozone	9	2014-06-08	Grab	Norway	Aker Stord	59.75777	5.49778	60
ZMBN 125775	POLNB2529-18		MT365588	Chaetozone	9	2014-06-08	Grab	Norway	Aker Stord	59.75777	5.49778	60
ZMBN 125776	POLNB2530-18			Chaetozone	4	2015-07-14		Norway		61.21307	5.03809	379
ZMBN 125777	POLNB2531-18			Chaetozone	5	2015-07-15		Norway		61.04889	4.97231	161
ZMBN 125779	POLNB2533-18			Chaetozone	10	2017-04-20	Grab	Norway	Håøysundet	60.54973	5.22897	37
ZMBN 125780	POLNB2534-18			Chaetozone	7	2017-03-06		Norway		60.60332	5.09513	94
ZMBN 125781	POLNB2535-18			Chaetozone	4	2012-07-20	RP	Norway		62.06827	5.03811	334
ZMBN 125783	POLNB2537-18		MT365589	Chaetozone	1	2012-07-21	RP	Norway		62.35117	6.16178	243
ZMBN 125787	POLNB2541-18			Chaetozone	7	2014-06-08	Grab	Norway	Aker Stord	59.76022	5.49682	40
ZMBN 125789	POLNB2543-18			Chaetozone	7	2014-06-10	TKS	Norway	Kvitsøy, S	59.02985	5.44881	59
ZMBN 125790	POLNB2544-18			Chaetozone	7	2014-06-08	RP	Norway	Karmøysundet	59.28789	5.32506	76
ZMBN 125795	POLNB2549-18			Chaetozone	7	2012-11-17	GR	Norway	Aurlandsfjorden	60.90389	7.16813	115
ZMBN 125796	POLNB2550-18			Chaetozone	4	2012-11-18	RP	Norway	Lustrafjorden-Nattropefjorden	61.42736	7.47479	332
ZMBN 125797	POLNB2551-18			Chaetozone	4	2012-11-18	RP	Norway	Lustrafjorden-Nattropefjorden	61.42736	7.47479	332
ZMBN 125798	POLNB2552-18			Chaetozone	4	2012-11-18	RP	Norway	Lustrafjorden-Nattropefjorden	61.42736	7.47479	332
ZMBN 125800	POLNB2554-18		MT365590	Chaetozone	2	2012-11-18	RP	Norway	Lustrafjorden-Nattropefjorden	61.42736	7.47479	332
ZMBN 125802	POLNB2556-18			Chaetozone	5	2014-09-02	Grab	Norway	Vest for Bjorøyna, Søra Kjerringsundet	60.32652	5.14085	75
ZMBN 125803	POLNB2557-18			Chaetozone	4
ZMBN 125805	POLNB2559-18		MT365591	Chaetozone	7
ZMBN 125808	POLNB2562-18			Chaetozone	10	2015-11-30	vV grab	Norway	Storøygrunnen	60.51035	5.19158	32
ZMBN 125811	POLNB2565-18			Chaetozone	8	2015-05-07		Norway		78.32855	15.14712	266
ZMBN 125812	POLNB2566-18			Chaetozone	8	2015-05-10		Norway		79.58854	18.63483	242
ZMBN 125813	POLNB2567-18			Chaetozone	8	2015-05-07		Norway		78.32855	15.14712	266
ZMBN 125815	POLNB2569-18			Chaetozone	8	2007-08-30		Norway		79.55130	11.22970	91
ZMBN 125816	POLNB2570-18			Chaetozone	8	2007-08-30		Norway		79.55130	11.22970	91
ZMBN 125817	POLNB2571-18			Chaetozone	8	2015-05-10		Norway		79.70829	18.17362	407
ZMBN 125818	POLNB2572-18			Chaetozone	8	2015-05-10		Norway		79.70829	18.17362	407
ZMBN 125819	POLNB2573-18			Chaetozone	10	2014-04-24	Grab	Norway	Sotra	60.17295	5.00315	6
ZMBN 125820	POLNB2574-18			Chaetozone	10	2014-04-24	Grab	Norway	Sotra	60.17295	5.00315	6
ZMBN 125823	POLNB2577-18			Chaetozone	2	03.10.2012		Norwegian Sea		62.48183	4.46550	211
ZMBN 125824	POLNB2578-18		MT365592	Chaetozone	7	2016-02-03		Norway		58.24753	6.53673	155
ZMBN 125837	POLNB2594-18			Chaetozone	8	2015-05-13	rp slede	Svalbard	Isfjorden	78.14872	13.12559	243
ZMBN 125838	POLNB2595-18			Chaetozone	8	2015-05-13	rp slede	Svalbard	Isfjorden	78.14872	13.12559	243
ZMBN129511		MT065934	MT365598	Chaetozone	8	2015-05-07			Svalbard	78.32855	15.14712	266
ZMBN129512		MT065935	MT365599	Chaetozone	8	2015-05-10				79.70829	18.17362	407
ZMBN129513			MT365600	Chaetozone	8	2015-05-09				79.68089	11.13989	180
ZMBN129514			MT365601	Chaetozone	8	2015-05-08				78,94234	11,97443
ZMBN129515		MT065936		Chaetozone	8	2015-05-10				79.70829	18.17362	407
ZMBN125917			MT365593	Chaetozone	7	2014-09-02				60.32652	5.14085	75
ZMBN125918			MT365594	Chaetozone	8	31.03.2014				60.39598	5.14948	172
ZMBN125922			MT365595	Chaetozone	10	2017-03-06				60.60332	5.09513	94
ZMBN125923			MT365596	Chaetozone	7	2017-06-01				60.54812	5.72772	20
ZMBN129510			MT365597	Chaetozone	8	2015-05-13			Isfjorden	78.14872	13.12559	243
MG159		MT065933		Chaetozone	7	2018			Drøbak
ZMBN129528		MT065916		Chaetozone	7	2014-09-02				60.28423	5.20145	72
ZMBN129529			MT365602	Chaetozone	6	2014-09-02				60.28423	5.20145	72
ZMBN129531		MT065917		Chaetozone	7	2014-09-02				60.28423	5.20145	72
ZMBN129533			MT365603	Chaetozone	6	2014-05-19	Grab		Vatlestraumen	60.33660	5.19405	20
ZMBN129534			MT365604	Chaetozone	6	14.07.2015			Sognesjøen, north of Skorpa	61.21307	5.03809	379
ZMBN129536			MT365605	Chaetozone	6	2015-07-14				61.21307	5.03809	379
ZMBN129538			MT365606	Chaetozone	1	14.07.2015			Sognesjøen, north of Skorpa	61.21307	5.03809	379
ZMBN129542			MT365607	Chaetozone	1	14.07.2015			Sognesjøen, west of Risnesøyna	61.12629	5.17834	573
ZMBN129544			MT365608	Chaetozone	7	2014-06-10				59.02985	5.44881	58
ZMBN129546		MT065918	MT365609	Chaetozone	7	2014-06-08				59.75777	5.49778	60
ZMBN129547		MT065919		Chaetozone	7	2014-06-10				59.02985	5.44881	58
ZMBN129549			MT365610	Chaetozone	8	2014-06-08				59.28789	5.32506	74
ZMBN129550		MT065920		Chaetozone	7	2014-06-08				59.28789	5.32506	74
ZMBN129551		MT065921	MT365611	Chaetozone	7	2014-06-10				59.02985	5.44881	58
ZMBN129552		MT065923		Chaetozone	4	2012-11-18				61.42736	7.47479	327
ZMBN129554		MT065924	MT365612	Chaetozone	2	17.11.2012				60.90893	7.16685	268
ZMBN129555			MT365613	Chaetozone	6	17.11.2012				60.90893	7.16685	268
ZMBN129556			MT365614	Chaetozone	2	2012-11-18				61.42736	7.47479	327
ZMBN129557		MT065925		Chaetozone	2	17.11.2012				60.91663	7.17029	284
ZMBN129567			MT365615	Chaetozone	7	2014-10-20	Rauschert sled		Drøbak	59.6444	10.6192	100
ZMBN129568			MT365616	Chaetozone	6	2011-10-27	Grab		Hurum: S for Storskjær	59.6556	10.6099	50
ZMBN129569			MT365617	Chaetozone	8	2014-10-22	Rectangular dredge		Drøbak	59.6981	10.5446	110
ZMBN129570			MT365618	Chaetozone	7	2014-10-20	Rauschert sled		Drøbak	59.6444	10.6192	100
ZMBN129571			MT365619	Chaetozone	1	2017-04-26				60.15192	5.09910	616
ZMBN129572			MT365620	Chaetozone	1	2017-04-27				59.55991	5.18724	358
ZMBN129573			MT365621	Chaetozone	1	2017-04-28				59.55992	5.18724	358
ZMBN129575		MT065926	MT365622	Chaetozone	2	2017-04-26				60.18435	5.19562	665
ZMBN129576		MT065927		Chaetozone	1	2017-04-28				59.56729	5.21568	328
ZMBN129577			MT365623	Chaetozone	1	2017-04-26				60.15175	5.09855	616
ZMBN129580		MT065928		Chaetozone	2	2017-04-27				60.13656	4.80873	327
ZMBN129581			MT365624	Chaetozone	1	2017-04-26				60.18435	5.19561	665
ZMBN129584		MT065929	MT365625	Chaetozone	1	2012-07-22	RP			61.11299	5.14124	354
ZMBN129585		MT065930		Chaetozone	1	2012-07-22	RP			61.13339	5.16632	631
ZMBN129596		MT065931	MT365626	Chaetozone	8	2015-05-07			Svalbard	78.32855	15.14712	266
MG026		MT065915	MT365546	Chaetozone	7	2018-02-08	Trekantskrape	Norway	Trondheimsfjorden	63.26852	10.37638
NTNUVM74464		MT066029		Chaetozone	7	11/2018	sledge	Sweden	Tjärnö	58.8	11.1
NTNUVM74465		MT066030	MT365549	Chaetozone	7	11/2018	sledge	Sweden	Tjärnö	58.8	11.1
NTNUVM74463		MT066028		Chaetozone	7	11/2018	sledge	Sweden	Tjärnö	58.8	11.1
NTNUVM74466		MT066031	MT365550	Chaetozone	7	11/2018	sledge	Sweden	Tjärnö	58.8	11.1
NTNUVM74462		MT066022	MT365548	Chaetozone	7	21/05/2018		Sweden	Tjärnö	58.0365	11.298	244
NTNUVM74468		MT066023	MT365551	Chaetozone	7	21/05/2018		Sweden	Tjärnö	58.0365	11.298	244
NTNUVM74469		MT066024	MT365552	Chaetozone	7	21/05/2018		Sweden	Tjärnö	58.0365	11.298	244
NTNUVM74470		MT066025	MT365553	Chaetozone	7	21/05/2018		Sweden	Tjärnö	58.0365	11.298	244
Arne4473		MT066016		Chaetozone	9	2014-06-10	Grab	Norway		59.02712	5.45419	64
Arne3680		MT066015		Chaetozone	7	2011-05-29	RP-sledge	Norway		59.05485	10.250467	63
Arne5084		MT066017		Chaetozone	12	2008-07-17	Day grab	Great Britain		58.093277	-2.80321	54
Arne5089		MT066018		Chaetozone	12	2008-07-18	Day grab	Great Britain		58.487413	-2.47511	69
Arne5091		MT066019		Chaetozone	12	2008-07-18	Day grab	Great Britain		58.487644	-2.47451	67
Arne5093		MT066020		Chaetozone	12	2008-07-25	Day grab	Great Britain		58.958215	-2.09047	80
NTNUVM74483		MT065996	MT365554	Chaetozone	12	2010	grab	Great Britain		51.352833	2.862	18.93
NTNUVM74484		MT065997		Chaetozone	12	2010	grab	Great Britain		51.352833	2.862	18.93
NTNUVM74485		MT065998	MT365555	Chaetozone	12	2010	grab	Great Britain		51.3575	2.804167	21.53
NTNUVM74486		MT066000		Chaetozone	12	2010	grab	Great Britain		51.354333	2.796667	22.4
ZMBN129642		MT065995		Chaetozone	12	2010	grab	Great Britain		51.354333	2.796667	22.4
NTNUVM74487		MT066001		Chaetozone	12	2010	grab	Great Britain		51.354333	2.796667	22.4
NTNUVM74488		MT066002	MT365556	Chaetozone	12	2011	grab	Great Britain		51.354333	2.796667
NTNUVM74489		MT066003		Chaetozone	3	2014-04-23	Large VV grab	Norway		71.187833	28.943167	380
NTNUVM74490		MT066004	MT365557	Chaetozone	3	2014-04-24	Large VV grab	Norway		71.322	29.195167	363
NTNUVM74491		MT066005	MT365558	Chaetozone	3	2014-04-25	Large VV grab	Norway		71.322	29.195167	363
NTNUVM74492		MT066006		Chaetozone	3	2014-04-21	Large VV grab	Norway		71.056	29.655667	337
NTNUVM74493		MT066007		Chaetozone	3	2014-04-22	Large VV grab	Norway		71.056	29.655667	337
ZMBN129638		MT065994		Chaetozone	3	2014-04-23	Large VV grab	Norway		71.056	29.655667	337
NTNUVM74494		MT066008	MT365559	Chaetozone	3	2014-04-24	Large VV grab	Norway		71.056	29.655667	337
NTNUVM74495		MT066009		Chaetozone	3	2014-04-25	Large VV grab	Norway		71.056	29.655667	337
NTNUVM74496		MT066011		Chaetozone	3	2014-04-26	Large VV grab	Norway		71.056	29.655667	337
NTNUVM74497		MT066012		Chaetozone	3	2014-04-27	Large VV grab	Norway		71.056	29.655667	337
Arne3630		MT066014		Chaetozone	3	2014-04-28	Large VV grab	Norway		71.056	29.655667	337
NTNUVM74498		MT066013		Chaetozone	3	2014-04-29	Large VV grab	Norway		71.056	29.655667	337
NTNUVM74499		MT065975		Chaetozone	7	2014-04-16	Large VV grab	Norway		70.262	31.083833	126
NTNUVM74500		MT065976		Chaetozone	4	2012-07-22	RP	Norway		61.11299	5.14124	354
NTNUVM74501		MT065978	MT365560	Chaetozone	7	2007-12-05	grab			60.28158	5.20288
NTNUVM74503		MT065979		Chaetozone	2	2012-07-22	RP	Norway		61.11299	5.14124	354
NTNUVM74504		MT065980		Chaetozone	7	2007-12-05	grab	Norway		60.28158	5.20288
NTNUVM74505		MT065981	MT365561	Chaetozone	1	2007-06-26	Warén sledge			59.99	5.35	250
NTNUVM74506		MT065982		Chaetozone	1	2007-06-26	Warén sledge	Norway		59.99	5.35	98250
NTNUVM74507		MT065983		Chaetozone	4	2012-07-22	RP	Norway		61.11299	5.14124	354
ZMBN129648		MT065974		Chaetozone	1	2007-06-26	Warén sledge	Norway		59.99	5.35	250
NTNUVM74508		MT065984	MT365562	Chaetozone	7	2011-05-29	RP-sledge	Norway		59.05485	10.250467	63
NTNUVM74509		MT065985	MT365563	Chaetozone	7	2011-05-29	RP-sledge	Norway		59.05485	10.250467	63
NTNUVM74510		MT065986	MT365564	Chaetozone	7	2011-05-29	RP-sledge	Norway		59.05485	10.250467	63
NTNUVM74511		MT065987	MT365565	Chaetozone	7	2011-05-29	RP-sledge	Norway		59.05485	10.250467	63
NTNUVM74513		MT065989	MT365566	Chaetozone	7	2011-05-29	RP-sledge	Norway		59.05485	10.250467	63
NTNUVM74514		MT065990		Chaetozone	7	2011-05-29	RP-sledge	Norway		59.05485	10.250467	63
NTNUVM74515			MT365567	Chaetozone	7	2011-05-29	RP-sledge			59.05485	10.250467	63
NTNUVM74516		MT065991		Chaetozone	7	2014-10-21	Rauschert sledge	Norway		59.6444	10.6192	106
NTNUVM74517		MT065992		Chaetozone	7	2014-10-21	Rauschert sledge	Norway		59.6444	10.6192	106
NTNUVM74518		MT065993		Chaetozone	7	2014-10-21	Rauschert sledge	Norway		59.6444	10.6192	106
ZMBN129641		MT065972		Chaetozone	7	2005	WS	Sweden		58.866667	11.1	60
ZMBN129647		MT065973		Chaetozone	7	2005	WS	Sweden		58.866667	11.1	60
NTNUVM74525		MT065956		Chaetozone	7	2014-07-25	Triangular dredge	Norway		60.269686	5.197750	120
NTNUVM74526		MT065957		Chaetozone	7	2014-07-25	Triangular dredge	Norway		60.269686	5.197750	120
NTNUVM74527			MT365568	Chaetozone	7	2014-07-25	Triangular dredge	Norway		60.269686	5.197750	120
NTNUVM74528		MT065958		Chaetozone	7	2014-07-25	Triangular dredge	Norway		60.269686	5.197750	120
NTNUVM74529		MT065959	MT365569	Chaetozone	10	2008-07-19	Day grab	Great Britain		60.179577	-1.387963	48
NTNUVM74530		MT065960		Chaetozone	7	2008-07-21	Day grab	Great Britain		60.142690	-1.408606	80
NTNUVM74549		MT361871	MT365579	Chaetozone	12	2008-07-22	Day grab	Great Britain		60.067133	-1.544078	111
NTNUVM74533		MT065961	MT365570	Chaetozone	10	2008-07-18	Day grab	Great Britain		58.487693	-2.475379	69
NTNUVM74534		MT065962	MT365571	Chaetozone	7	2008-07-17	Day grab	Great Britain		57.855260	-2.827592	90
NTNUVM74535		MT065963		Chaetozone	7	2008-07-22	Day grab	Great Britain		60.041677	-1.563350	125
NTNUVM74551			MT365580	Chaetozone	8	2008-07-18	Day grab	Great Britain		58.487413	-2.475109	69
NTNUVM74552		MT065971	MT365581	Chaetozone	12	2008-07-18	Day grab	Great Britain		58.487693	-2.475379	69
NTNUVM74536		MT065964	MT365572	Chaetozone	11	2008-07-17	Day grab	Great Britain		57.777177	-2.905357	37
NTNUVM74537			MT365573	Chaetozone	12	2008-07-17	Day grab	Great Britain		57.777177	-2.90536	37
NTNUVM74540		MT065965	MT365574	Chaetozone	7	2008-07-25	Day grab	Great Britain		58.739461	-2.320136	74
NTNUVM74542		MT065967	MT365575	Chaetozone	10	2008-07-24				59.280054	-1.962509	95
NTNUVM74553			MT365582	Chaetozone	12	2008-07-25				58.873064	-2.190586	85
NTNUVM74543		MT065968	MT365576	Chaetozone	12	2008-07-17				58.093170	-2.803259	54
NTNUVM74544		MT065969	MT365577	Chaetozone	12	2008-07-18				58.274315	-2.645119	55
NTNUVM74546		MT065970	MT365578	Chaetozone	12	2008-07-25		Great Britain		58.958555	-2.090354	80
NTNUVM74555		MT361869	MT365583	Chaetozone	8	2016-09-06		Norway		63°35,773	9°32,55	15-30
MG388		MT065948	MT365547	Chaetozone	24	2017-07-26		Spain		39°33'55.7"N	2°37'54.7"E	1
MG393		MT065949		Chaetozone	20	2017-07-26		Spain		39°33'24.0"N	2°37'32.9"E	4 m
ZMBN129620			MT365632	Chaetozone	7	2006-06-28		Norway		58,3876	8,7490	66
ZMBN129611		MT065940	MT365631	Chaetozone	8	2018-08-27		Norway		80.09203	22.15295	214
ZMBN129607		MT065938	MT365629	Chaetozone	8	2018-08-28		Norway		80.17148	22.14984	213
ZMBN129610		MT065939	MT365630	Chaetozone	8	2018-08-24		Norway		79.10484	11.64821	274
ZMBN129602		MT065932	MT365627	Chaetozone	8	2018-08-24		Norway		79.10016	11.63282	270
ZMBN129603		MT065937	MT365628	Chaetozone	14	2015-09-02		Norway		66.84333	7.89450	735
ZMBN129621			MT365633	Chaetozone	7			Norway
ZMBN129625			MT365634	Chaetozone	8	2017-01-06				60.54812	5.72772
ZMBN129626		MT065941		Chaetozone	7	2017-06-03				60.60332	5.09513	94
ZMBN129627			MT365635	Chaetozone	9	2017-06-03				60.60332	5.09513	94
ZMBN129628			MT365636	Chaetozone	6	2017-06-03				60.60332	5.09513	94
ZMBN129632			MT365637	Chaetozone	8
ZMBN129633		MT065942	MT365638	Chaetozone	1	2017-04-28				59.56729	5.21568	328
ZMBN129634		MT065943		Chaetozone	1	2017-04-26				60.18435	5.19561	665
ZMBN129635			MT365639	Chaetozone	1	2017-04-26				60.15175	5.09855	616
ZMBN129636			MT365640	Chaetozone	1	2017-04-26				60.15192	5.09910	616
PAR06i11		MT065977		Chaetozone	18	2017-07-26		Spain		39°33'10.4"N	2°37'55.4"E	0.5 m
PAR06i14		MT065988		Chaetozone	18	2017-07-26		Spain		39°33'10.4"N	2°37'55.4"E	0.5 m
SPD05i03		MT066021		Chaetozone	19
PAD02i07		MT065910		Chaetozone	20	2017-07-26		Spain		39°33'55.7"N	2°37'54.7"E	1 m
PAD04i04		MT065966		Chaetozone	20	2017-07-26		Spain		39°33'24.0"N	2°37'32.9"E	4 m
PAD02i09b		MT065955		Chaetozone	21	2017-07-26		Spain		39°33'55.7"N	2°37'54.7"E	1 m
